# Supplementary material for: Disruption of rack1 suppresses SHH‐type medulloblastoma formation in mice
Source: PubMed Central journal article supplement (PMC8611787; doi:10.1111/cns.13728), 2021-09-04

PC: Positive Control

WT: SmoM2<sup>+/-</sup>; Rack1<sup>F/F</sup>

MR: Atoh1-Cre; Rack1<sup>F/F</sup>

MS: Atoh1-Cre; SmoM2<sup>+/-</sup>

MSR: Atoh1-Cre; SmoM2<sup>+/-</sup>; Rack1<sup>F/F</sup>

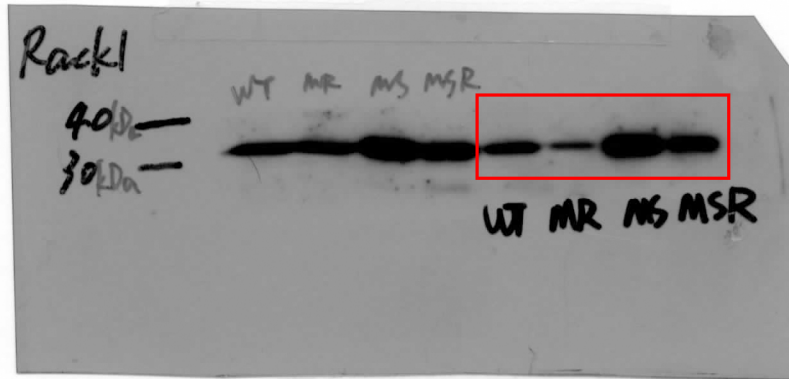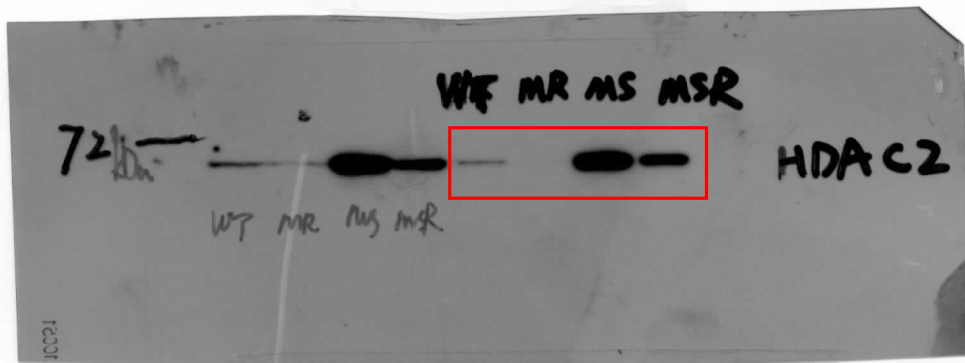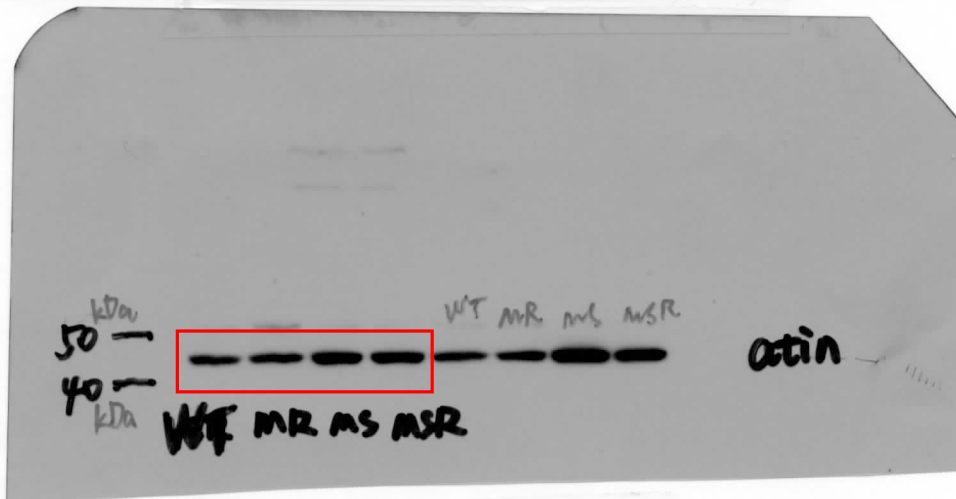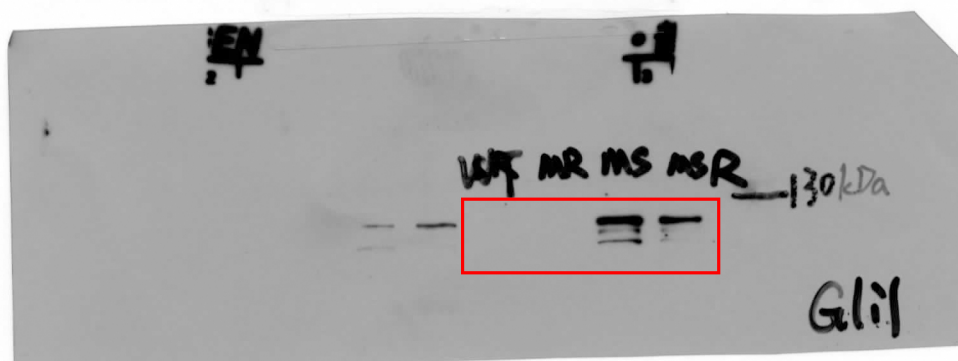

Supplement: CNS-27-1518-s002.pdf [file CNS-27-1518-s002.pdf]
